# Supplementary material
Source: Royal Society of Chemistry journal article supplement (doi:10.1039/d5cp04951b)
Supplement: d5cp04951b2.pdf [file d5cp04951b2.pdf]

Supporting Information for:

**Aromatic Amine Nitration Mechanisms: Reactivity Governed by Resonance-Assisted Hydrogen Bonds**

Tianlong Wu<sup>a</sup>, Zhe Wu<sup>a</sup>, Guo-Ping Lu<sup>a</sup>, Hua Guan<sup>a</sup>, Dabin Liu<sup>a</sup>, Yingzhe Liu<sup>b</sup>, Baojing Zhou<sup>a\*</sup>

<sup>a</sup> School of Chemistry and Chemical Engineering, Nanjing University of Science & Technology, Nanjing, 210094, China

<sup>b</sup> Xi'an Modern Chemistry Research Institute, Xi'an, 710065, China

\* Corresponding author: [bzhou@mail.njust.edu.cn](mailto:bzhou@mail.njust.edu.cn)

**Contents:**

- 1. Structural properties of substrates**
- 2. Thermodynamic parameters for stepwise and synergistic mechanisms**
- 3. DFT optimized cartesian coordinates for substrates**

## 1. Structural properties of substrates

**Table S1** Structural and electronic features of substrate amino groups: H-N-H bond angle, hybridization of N atom, electron density ( $10^{-4}$  a.u.) at hydrogen bond critical point and QTAIM charges of N atom.

| Substrate            | $\angle$ H-N-H | hybridization | $\rho_{\text{BCP}}$ | charges |
|----------------------|----------------|---------------|---------------------|---------|
| 3-AT                 | 112°           | sp3           | -                   | -1.14   |
| ANPZ                 | 120°           | sp2           | 249.90              | -1.26   |
| LLM-105 <sup>a</sup> | 122°           | sp2           | 251.23/235.30       | -1.26   |
| TATB                 | 121°           | sp2           | 414.50              | -1.28   |
| TATB-Ac              | -              | sp2           | 210.54              | -1.23   |

a. The amino groups of LLM-105 contain two asymmetric hydrogen atoms.

**Table S2** The NICS(1)zz value (ppm) at the center of the aromatic ring and EDDB<sup>k</sup> value ( $e^-$ ) of the amino group for different substrates obtained from DFT.

| Substrate | NICS(1)zz | EDDB <sup>k</sup> |
|-----------|-----------|-------------------|
| 3-AT      | -8.88     | 0.42              |
| ANPZ      | -5.45     | 0.81              |
| LLM-105   | -6.67     | 0.86              |
| TATB      | -5.03     | 0.89              |
| TATB-Ac   | -9.23     | -                 |
| Benzene   | -10.10    | -                 |

## 2. Thermodynamic parameters for stepwise and synergistic mechanisms

**Table S3** Computed single-point electronic energies ( $E_{sp}^{M06-2X}$ ), thermal correction to the Gibbs free energies ( $G_{corr}^{M06-2X}$ ) at 298.15 K and solvation free energies ( $\Delta G_{solv}^{M05-2X}$ ) for different states along the stepwise nitration pathway of five substrates and benzene in the formamide ( $\epsilon = 108.9$ ) and total changes of the solution-phase Gibbs free energy ( $\Delta G_{soln}^{Total}$ ) from reactants to other states including the reactant complex (RC), TS and  $\sigma$ -complex (Fig. 2, 5a, 6, 9a in the text). The unit is kcal/mol.

| Substrate | State              | $E_{sp}^{M06-2X}$ | $G_{corr}^{M06-2X}$ | $\Delta G_{solv}^{M05-2X}$ | $\Delta G_{soln}^{Total}$ |
|-----------|--------------------|-------------------|---------------------|----------------------------|---------------------------|
| 3-AT      | reactants (step 1) | -315213.37        | 25.57               | -91.78                     | -                         |
|           | RC                 | -315232.41        | 33.73               | -77.40                     | 1.61                      |
|           | TS                 | -315235.24        | 34.55               | -74.48                     | 2.52                      |
|           | $\sigma$ -complex  | -315241.28        | 37.29               | -79.57                     | -5.87                     |
|           | reactants (step 2) | -491178.04        | 30.30               | -141.06                    | -                         |
|           | products           | -491341.70        | 42.21               | -5.21                      | -17.79                    |
| ANPZ      | reactants          | -620482.34        | 43.44               | -81.29                     | -                         |
|           | RC                 | -620496.97        | 53.70               | -71.21                     | 3.82                      |
|           | TS                 | -620499.90        | 54.45               | -62.05                     | 10.81                     |
|           | $\sigma$ -complex  | -620501.17        | 56.25               | -65.79                     | 7.59                      |
| LLM-105   | reactants          | -667648.55        | 45.90               | -72.86                     | -                         |
|           | RC                 | -667687.54        | 57.06               | -61.16                     | -10.78                    |
|           | TS                 | -667666.86        | 57.05               | -58.74                     | 12.31                     |
|           | $\sigma$ -complex  | -667665.90        | 57.76               | -61.03                     | 11.69                     |
| TATB      | reactants          | -763418.57        | 68.79               | -72.86                     | -                         |
|           | RC                 | -763440.15        | 77.13               | -62.39                     | -4.67                     |
|           | TS                 | -763434.83        | 78.14               | -51.06                     | 12.99                     |
|           | $\sigma$ -complex  | -763445.71        | 79.85               | -51.97                     | 2.92                      |
| TATB-Ac   | reactants          | -1050773.27       | 68.79               | -82.98                     | -                         |
|           | RC                 | -1050788.64       | 141.47              | -74.16                     | 1.77                      |
|           | TS                 | -1050794.16       | 142.14              | -50.23                     | 20.84                     |
|           | products           | -1050799.84       | 138.75              | -65.92                     | -3.90                     |
| Benzene   | reactants          | -274188.70        | 41.06               | -76.30                     | -                         |
|           | RC                 | -274207.72        | 49.54               | -62.56                     | 1.30                      |
|           | TS                 | -274213.11        | 49.70               | -50.35                     | 8.29                      |
|           | $\sigma$ -complex  | -274218.21        | 50.76               | -62.96                     | -8.36                     |

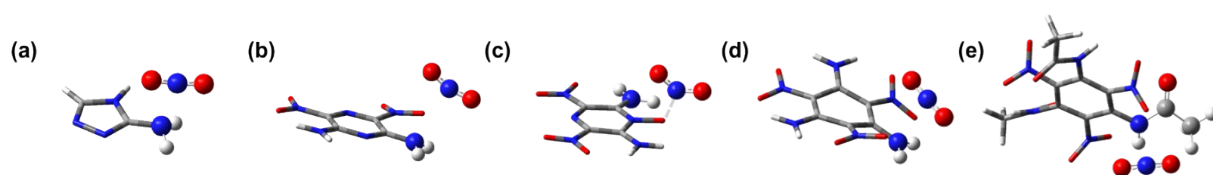

**Figure S1** Structures of reactant complexes (RC) formed from (a) 3-AT, (b) ANPZ, (c) LLM-105, (d) TATB, and (e) TATB-Ac with  $\text{NO}_2^+$  in the stepwise mechanism of aromatic amine nitration.

**Table S4** Computed single-point electronic energies ( $E_{sp}^{M06-2X}$ ), thermal correction to the Gibbs free energies ( $G_{corr}^{M06-2X}$ ) at 298.15 K and solvation free energies ( $\Delta G_{solv}^{M05-2X}$ ) for different states along the synergistic nitration pathway of five substrates in the formamide ( $\epsilon = 108.9$ ) and total changes of the solution-phase Gibbs free energy ( $\Delta G_{soln}^{Total}$ ) from reactants to other states including the reactant complex (RC), TS and products (Fig. 3, 5b, 7, 9b in the text). The unit is kcal/mol.

| Substrate | State     | $E_{sp}^{M06-2X}$ | $G_{corr}^{M06-2X}$ | $\Delta G_{solv}^{M05-2X}$ | $\Delta G_{soln}^{Total}$ |
|-----------|-----------|-------------------|---------------------|----------------------------|---------------------------|
| 3-AT      | reactants | -491307.81        | 28.64               | -5.69                      | -                         |
|           | RC        | -491316.67        | 41.76               | -3.64                      | 4.42                      |
|           | TS        | -491303.70        | 42.84               | -6.04                      | 16.06                     |
|           | products  | -491341.70        | 42.21               | -5.21                      | -21.73                    |
| ANPZ      | reactants | -796576.78        | 46.51               | 4.80                       | -                         |
|           | RC        | -796584.19        | 59.59               | 4.32                       | 3.29                      |
|           | TS1       | -796560.87        | 61.98               | -3.44                      | 21.25                     |
|           | TS2       | -796553.90        | 61.76               | -7.50                      | 23.93                     |
|           | products  | -796595.34        | 60.85               | 0.13                       | -10.78                    |
| LLM-105   | reactants | -843742.98        | 48.97               | 5.98                       | -                         |
|           | RC        | -843752.16        | 62.17               | 6.49                       | 2.64                      |
|           | TS1       | -843721.24        | 63.46               | -3.55                      | 24.82                     |
|           | TS2       | -843721.74        | 63.81               | -4.19                      | 24.02                     |
|           | products  | -843764.22        | 64.10               | 1.30                       | -12.67                    |
| TATB      | reactants | -939513.00        | 71.86               | 13.23                      | -                         |
|           | RC        | -939520.37        | 83.67               | 10.99                      | 0.31                      |
|           | TS        | -939493.15        | 87.12               | 4.29                       | 24.28                     |
|           | products  | -939533.96        | 86.72               | 6.53                       | -14.69                    |
| TATB-Ac   | reactants | -1226867.71       | 134.33              | 3.11                       | -                         |
|           | RC        | -1226871.15       | 146.12              | 2.81                       | 6.15                      |
|           | TS        | -1226843.94       | 148.55              | -4.54                      | 28.45                     |
|           | products  | -1226890.61       | 148.76              | 2.19                       | -11.28                    |

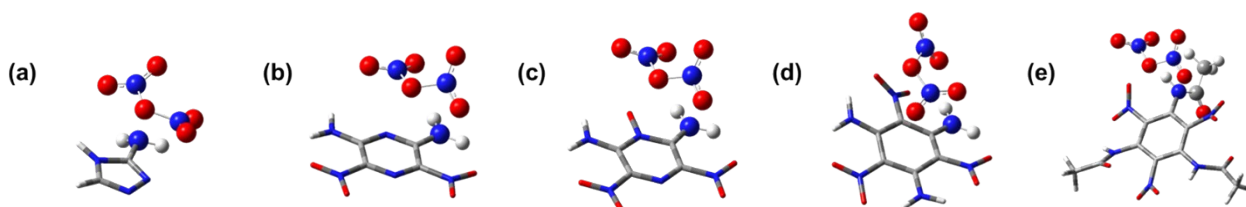

**Figure S2** Structures of reactant complex (RC) formed from (a) 3-AT, (b) ANPZ, (c) LLM-105, (d) TATB, (e) TATB-Ac with  $N_2O_5$  in the synergistic mechanism of aromatic amine nitration.

**Table S5** The three lowest frequencies (at 298.15 K) obtained from TS geometry optimization for each nitration pathway.

| Nitration type        | Substrate     | Freq <sup>1</sup> | Freq <sup>2</sup> | Freq <sup>3</sup> |
|-----------------------|---------------|-------------------|-------------------|-------------------|
| Stepwise mechanism    | 3-AT          | -210.27           | 38.14             | 47.04             |
|                       | ANPZ          | -319.69           | 37.36             | 50.38             |
|                       | LLM-105       | -191.56           | 48.09             | 51.81             |
|                       | TATB          | -351.22           | 23.80             | 33.53             |
|                       | TATB-Ac       | -187.70           | 34.99             | 36.84             |
|                       | Benzene       | -199.28           | 18.87             | 125.13            |
| Synergistic mechanism | 3-AT          | -319.95           | 39.15             | 64.12             |
|                       | ANPZ (TS1)    | -318.79           | 30.23             | 35.08             |
|                       | ANPZ (TS2)    | -381.67           | 28.67             | 34.47             |
|                       | LLM-105 (TS1) | -415.34           | 29.39             | 35.27             |
|                       | LLM-105 (TS2) | -389.59           | 31.40             | 42.09             |
|                       | TATB          | -349.06           | 26.56             | 28.81             |
|                       | TATB-Ac       | -317.82           | 24.45             | 31.38             |

**Table S6** Comparison of barriers ( $\Delta G^\ddagger$ ) and reaction Gibbs free energy changes ( $\Delta_r G_m$ ) calculated at the M06-2X/def2-TZVP and DLPNO-CCSD(T)/def2-TZVPP levels. The unit is kcal/mol.

| Nitration type        | Substrate  | $\Delta G^\ddagger$ | $\Delta G^\ddagger$ | $\Delta_r G_m$ | $\Delta_r G_m$ |
|-----------------------|------------|---------------------|---------------------|----------------|----------------|
|                       |            | M06-2X              | DLPNO-CCSD(T)       | M06-2X         | DLPNO-CCSD(T)  |
| Stepwise mechanism    | 3-AT       | 2.51                | 5.79                | -5.87          | -2.06          |
|                       | ANPZ       | 10.81               | 12.33               | 7.59           | 8.73           |
|                       | TATB       | 12.99               | 9.98                | 2.92           | 4.59           |
| Synergistic mechanism | 3-AT       | 16.06               | 16.28               | -21.73         | -20.11         |
|                       | ANPZ (TS1) | 21.25               | 21.48               | -10.78         | -10.52         |
|                       | ANPZ (TS2) | 23.93               | 23.89               | -10.78         | -10.52         |
|                       | TATB       | 24.28               | 23.01               | -14.69         | -13.66         |

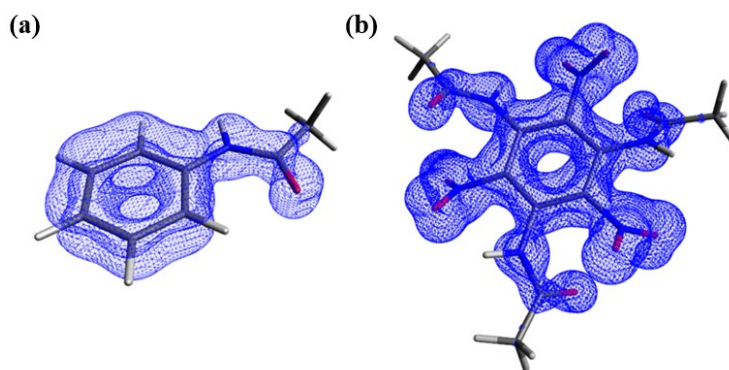

**Figure S3** Comparison of structures of (a) acetanilide and (b) TATB-Ac. Blue mesh represents the delocalized  $\pi$ -electron density computed from DFT.

### **3. DFT optimized cartesian coordinates for substrates**

The optimized Cartesian coordinates are provided in a separate compressed archive. (Structures.zip)
